# Supplementary material
Source: PubMed Central journal article supplement (PMC7101140)
Supplement: jciinsight-5-133977-s244.pdf [file jciinsight-5-133977-s244.pdf]

## **Supplementary information file**

### **TGFβ inhibition via CRISPR promotes the long-term efficacy of CAR-T cells against solid tumors**

Na Tang<sup>1</sup>✉, Chen Cheng<sup>1, 3</sup>✉, Xingying Zhang<sup>1, 2</sup>, Miaomiao Qiao<sup>1, 2</sup>, Na Li<sup>1</sup>, Wei Mu<sup>1, 2</sup>, Xiao-Fei Wei<sup>4</sup>, Weidong Han<sup>5</sup>, Haoyi Wang<sup>1, 2, 6</sup>\*

<sup>1</sup>State Key Laboratory of Stem Cell and Reproductive Biology, Institute of Zoology, Chinese Academy of Sciences, Beijing, 100101, China

<sup>2</sup>University of Chinese Academy of Sciences, Beijing, 100049, China

<sup>3</sup>School of Life Sciences, University of Science and Technology of China, Hefei, Anhui, 230026, China

<sup>4</sup>Beijing Cord Blood Bank, Beijing, 100176, China

<sup>5</sup>Department of Bio-therapeutic, Department of Molecular & Immunology, Chinese PLA General Hospital, Beijing, 100853, China

<sup>6</sup>Institute for Stem Cell and Regeneration, Chinese Academy of Sciences, Beijing 100101, China

✉These authors contributed equally to this work.

\*To whom correspondence should be addressed. Tel: +86 10 82619213; Fax: +86 10 82610049; Email: [wanghaoyi@ioz.ac.cn](mailto:wanghaoyi@ioz.ac.cn)

Present address: Haoyi Wang, State Key Laboratory of Stem Cell and Reproductive Biology, Institute of Zoology, Chinese Academy of Sciences, Beijing, 100101, China

The authors declare there is no conflict of interest.

## **Contents:**

**Figure S1: Construction of TGFβ1 over-expression CRL5826 cell line.**

**Figure S2: Selection of sgRNAs targeting *TGFBR2*.**

**Figure S3: *TGFBR2* editing did not affect the proliferation, GFP expression and T cell subsets of CAR-T cells.**

**Figure S4: TGFβ1 affects the expression of exhaustion related genes in CD4 and CD8 CAR-T cells.**

**Figure S5: TGFβ1 induced iTreg-like cell conversion of CAR-T cells after incubation with tumor cells.**

**Figure S6: *FOXP3* editing on CAR-T cells.**

**Figure S7: *TGFBR2* KO down-regulated TGFβ1 induced expression of exhaustion related genes.**

**Figure S8: *TGFBR2* KO could totally rescue the inhibitory effects of mTGFβ1.**

**Figure S9: Detection of in vivo tumor elimination efficacy of *TGFBR2* KO CAR-T cells in CRL5826 CDX model.**

**Figure S10: Detection of in vivo tumor elimination efficacy of *TGFBR2* KO CAR-T cells in CRL5826-PDL1 CDX model.**

**Figure S11: Detection of in vivo tumor elimination efficacy of *TGFBR2* KO CAR-T cells in PDX#1 model.**

**Figure S11: Detection of in vivo tumor elimination efficacy of *TGFBR2* KO CAR-T cells in PDX#2 model.**

**Figure S12: *TGFBR2* KO performed better than dn*TGFBR2* OE in anti-TGFβ 1 negative effect on CAR-T cell specific lysis ability**

**Table S1: Primer sequences used in this study.**

Figure S1

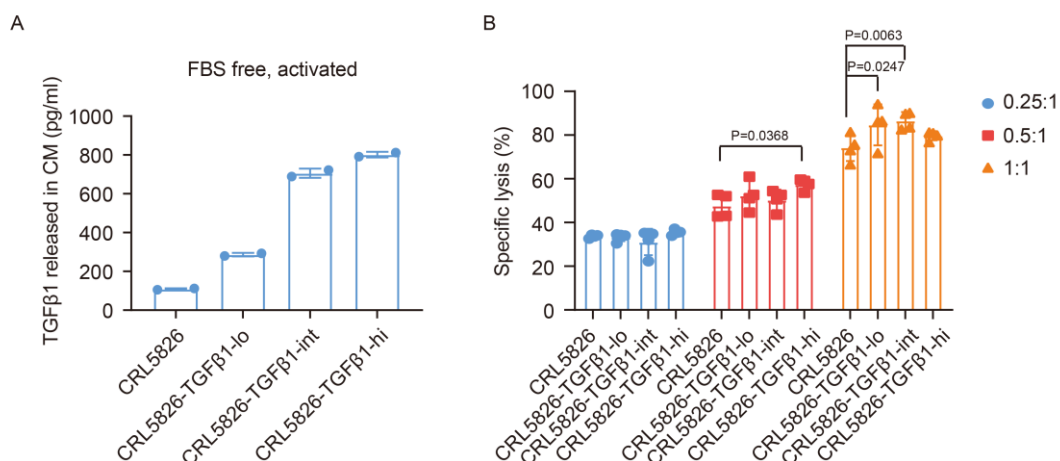

**Figure S1: Construction of TGFβ1 over-expression CRL5826 cell line. (A)**

Concentration of TGFβ 1 released in the culture medium of CRL5826 and TGFβ 1

over-expression CRL5826. (B) Specific lysis of CRL5826 and TGFβ 1

over-expression CRL5826 after co-culture with M28z CAR-T cells at different

Effector to Target ratio (E:T). The statistical analysis represented mean  $\pm$  s.d. of two

technical replications per assay in A, and three technical replications per assay in B.

Two-way ANOVA and Tukey's multiple comparisons test was used in B. The assays

in A were repeated two times, and in B were repeated more than three times.

Figure S2

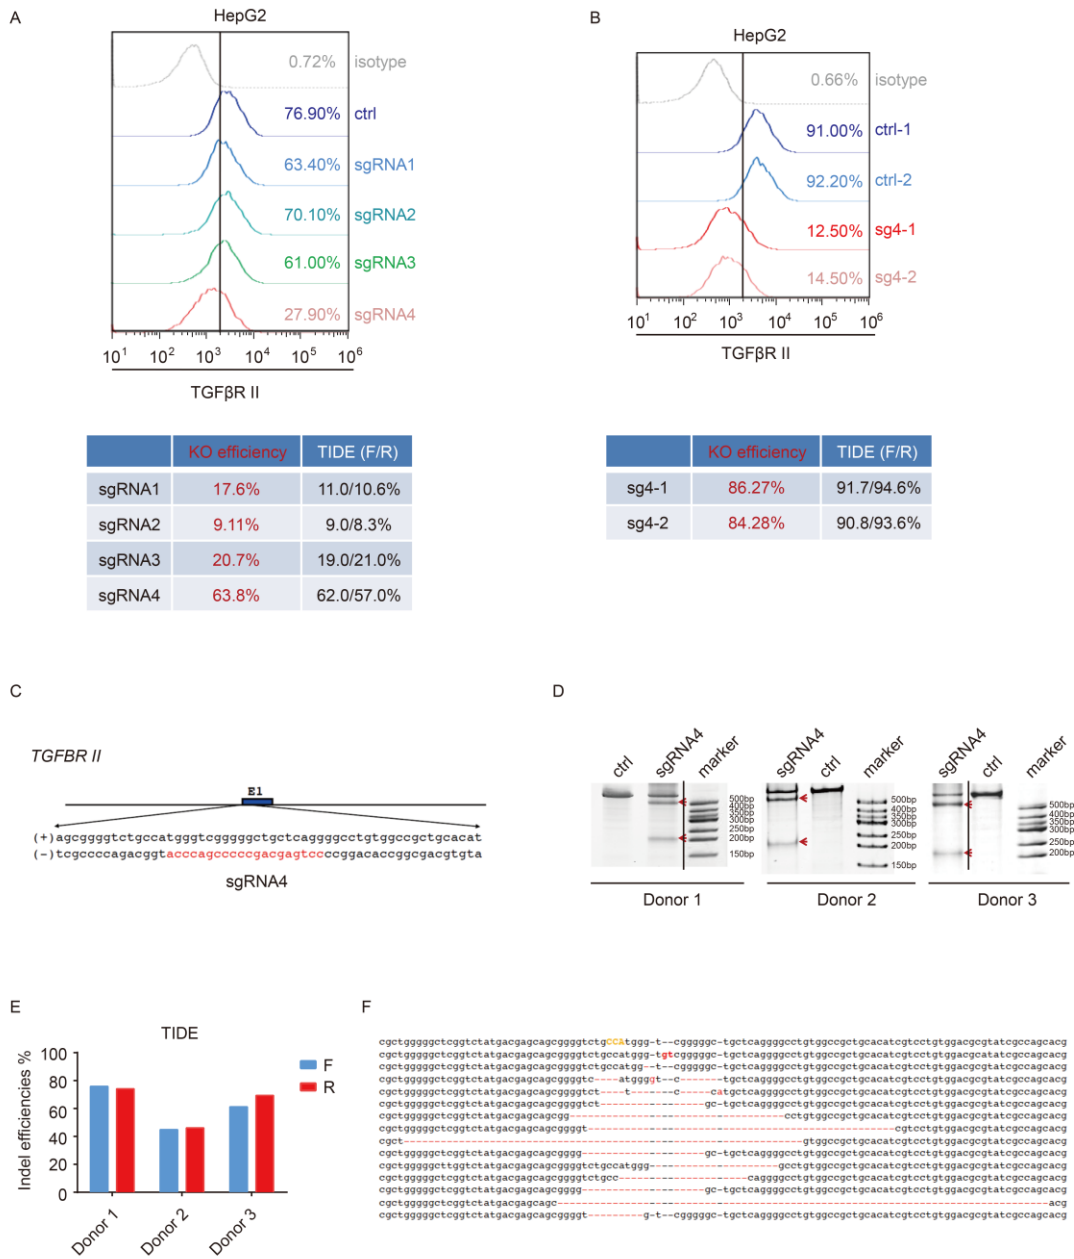

**Figure S2: Design of sgRNAs targeting *TGFBR2*.** (A) Editing efficiencies of sgRNA1-4 on HepG2 cell line were detected by TIDE and FACS. (B) Editing efficiencies of sgRNA4 on HepG2 cell line after optimizing were detected by TIDE and FACS analysis. (C) sgRNA4 targeting *TGFBR2*. (D-F) *TGFBR2* editing efficiencies in CAR-T cells were detected by Surveyor assay (D), TIDE analysis (E) and TA cloning (F).

Figure S3

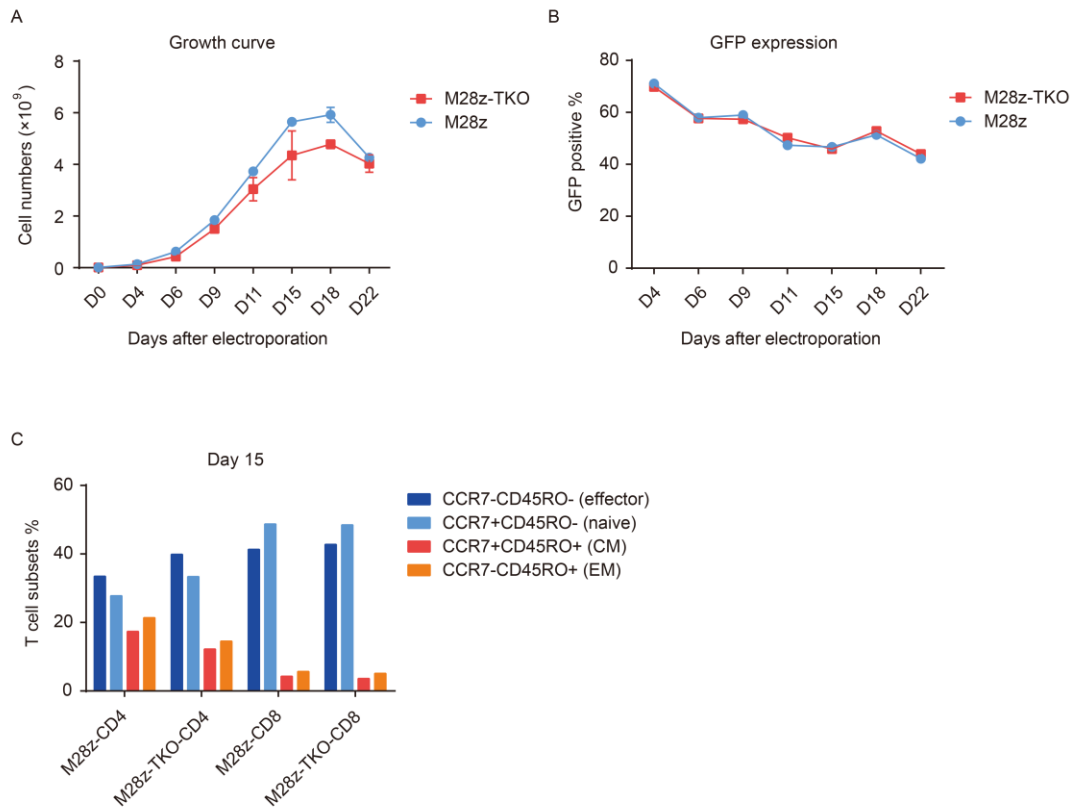

**Figure S3: *TGFBR2* editing did not affect the proliferation (A), GFP expression (B) and T cell subsets (C) of CAR-T cells. M28z-TKO, *TGFBR2* KO M28z.**

Figure S4

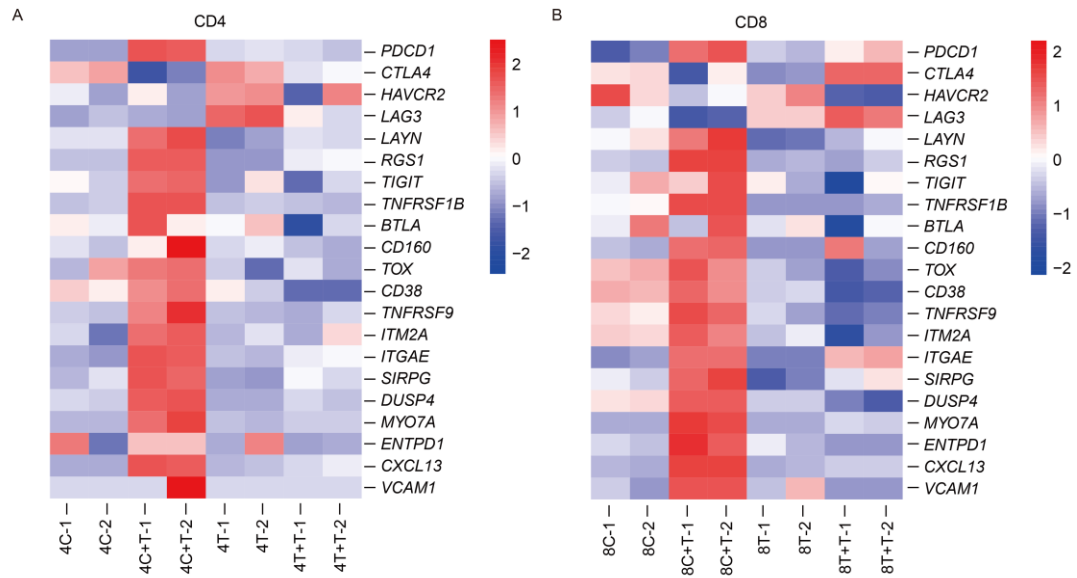

**Figure S4: TGFβ1 affects the expression of exhaustion related genes in CD4 (A) and CD8 (B) CAR-T cells.** 4C, CD4-ctrl; 4C+T, CD4-ctrl+ TGFβ1; 8C, CD8-ctrl; 8C+T, CD8-ctrl+ TGFβ1; 4T, CD4-TKO; 4T+T, CD4-TKO+ TGFβ1; 8T, CD8-TKO; 8T+T, CD8-TKO+ TGFβ1.

Figure S5

A

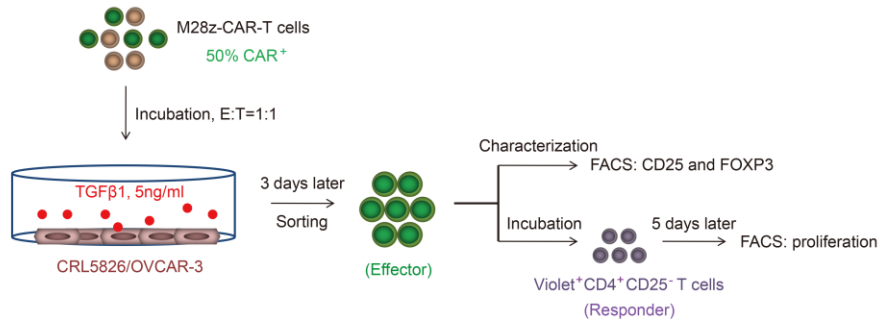

B

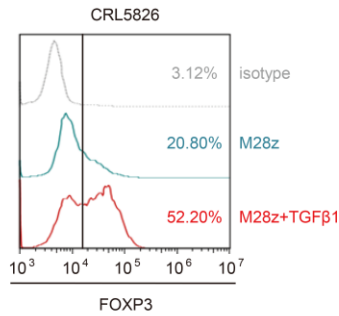

C

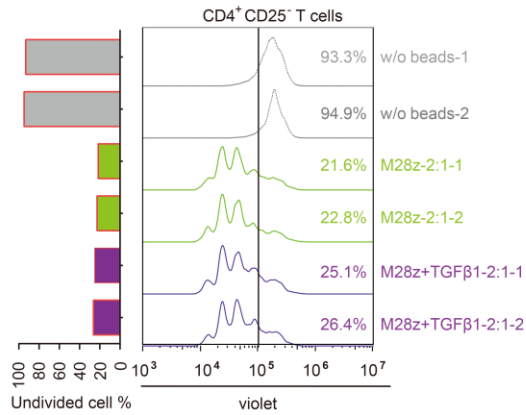

D

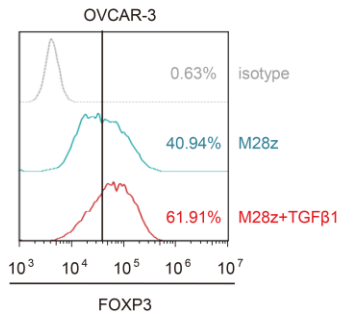

E

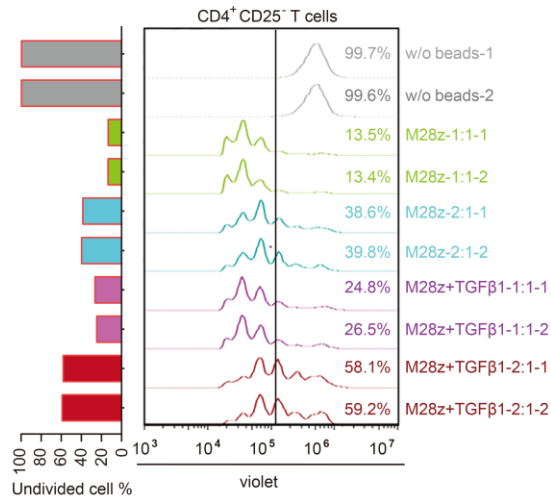

**Figure S5: TGFβ1 induced iTreg-like cell conversion of CAR T cells after incubation with tumor cells.** (A) Schematic of the proliferation suppression assay. FOXP3 expression in M28z CAR-T cells after incubation with CRL5826 (B) or OVCAR3 (D) in the presence of 5 ng/ml TGFβ1. Proliferation suppression capability of M28z CAR-T cells after incubation with CRL5826 (C) or OVCAR3 (E) in the presence or absence of 5 ng/ml TGFβ1.

Figure S6

A

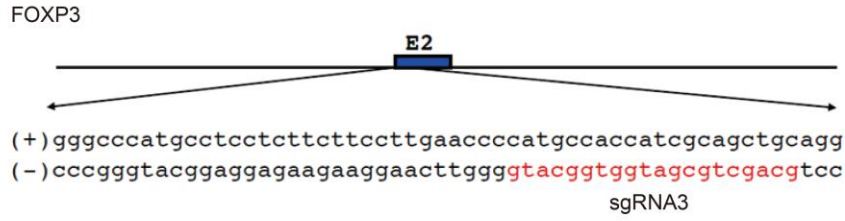

B

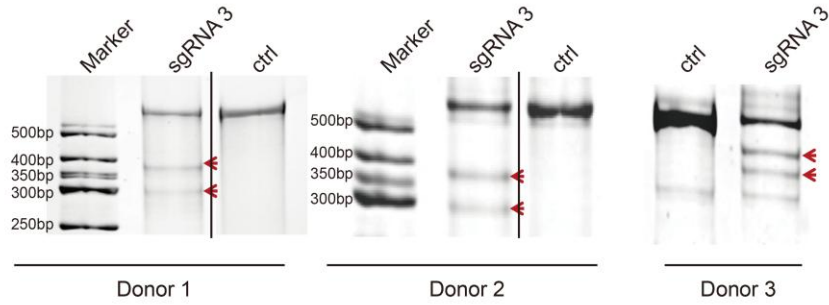

C

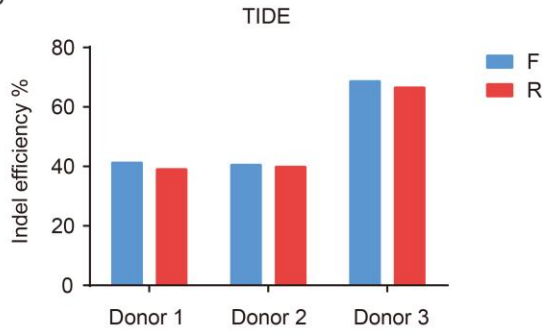

D

```

TCCTGGGCCCAGGGCCTCACCTGCAGCTGCGATGGTGG-CATGGGGTTCAAGGAAGAAGAGGAGGCATGGGCCCCGCCTCGAA
TCCTGGGCCCAGGGCCTCACCTGCAGCTGCGATGGTGGCATGGGGTTCAAGGAAGAAGAGGAGGCATGGGCCCCGCCTCGAA
TCCTGGGCCCAGGGCCTCACCTGCAGCTGCG-T--T--CC-T--GGGTTCAAGGAAGAAGAGGAGGCATGGGCCCCGCCTCGAA
TCCTGGGCCCAGGGCCTCACCTGCAGCTGCGATGGTGG-----GGGTTCAAGGAAGAAGAGGAGGCATGGGCCCCGCCTCGAA
TCCTGGGCCCAGGGCCTCACCTGCAGCTGCGATGG-----GGTTCAGGAAGAAGAGGAGGCATGGGCCCCGCCTCGAA
TCCTGGGCCCAGGGCCTCACCTGCAGCTGCGATGGT-----TCAAGGAAGAAGAGGAGGCATGGGCCCCGCCTCGAA
TCCTGGGCCCAGGGCCTCACCTGCA-----AGGAAGAAGAGGAGGCATGGGCCCCGCCTCGAA
-----TTCAAGGAAGAAGAGGAGGCATGGGCCCCGCCTCGAA
  
```

**Figure S6: *FOXP3* editing on CAR-T cells.** (A) sgRNA3 targeting *FOXP3*. (B-D) *FOXP3* editing efficiencies in CAR-T cells detected by Surveyor assay (B), TIDE analysis (C) and TA clone (D).

Figure S7

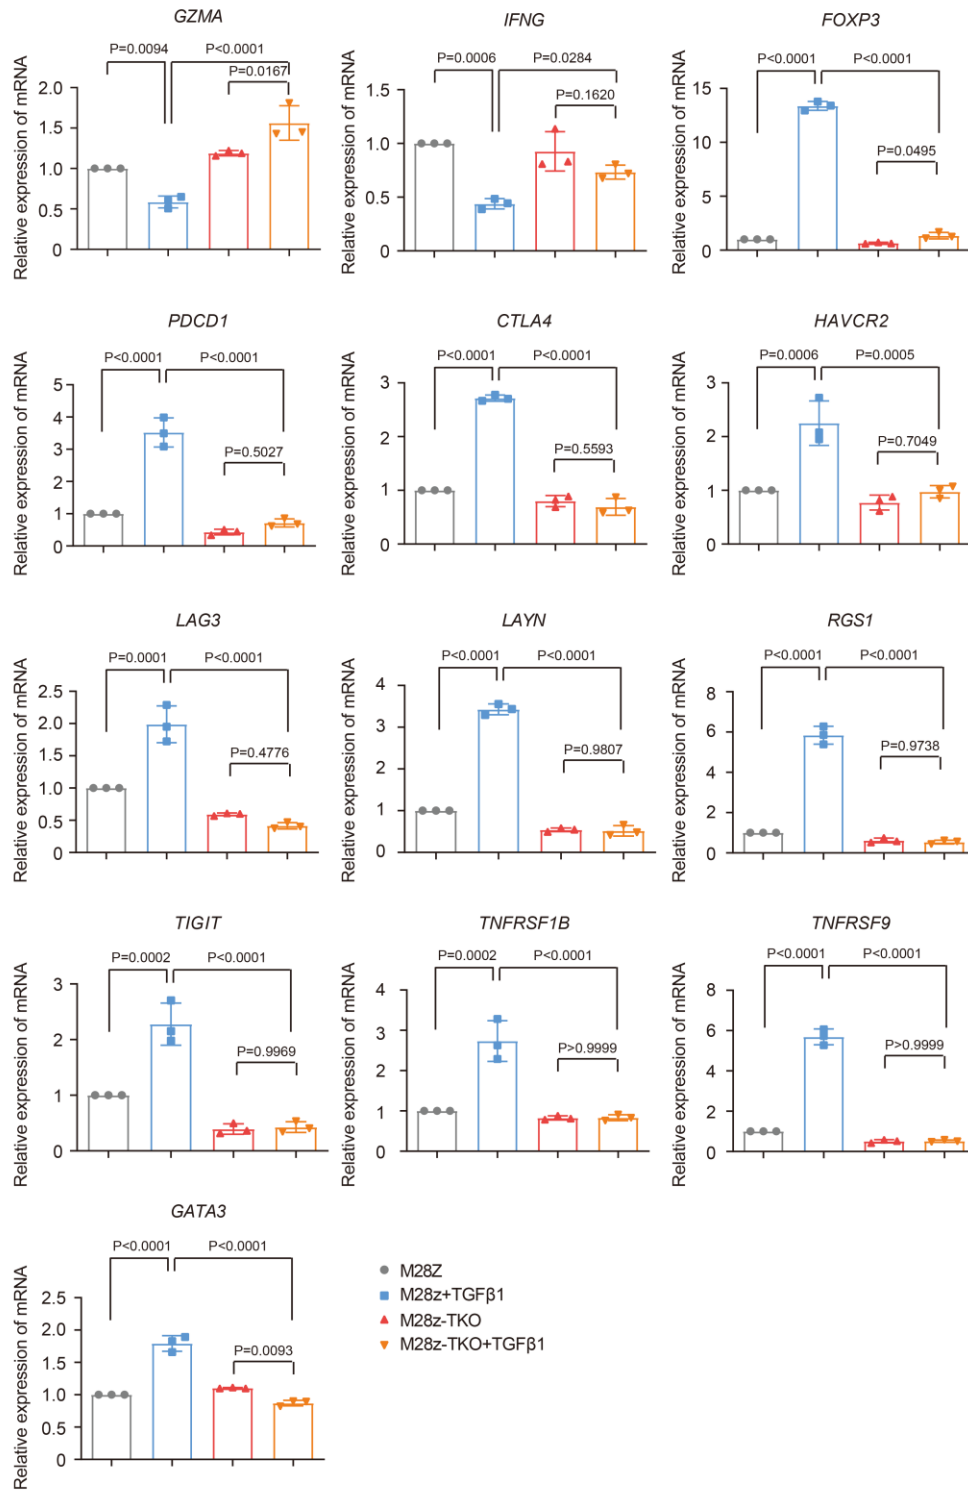

**Figure S7: *TGFBR2* KO down-regulated TGFβ1 induced expression of exhaustion related genes.** The statistical analysis represented mean  $\pm$  s.d. of three technical repetitions in one assay. Ordinary one-way ANOVA and Tukey's multiple comparisons test was used. The assays were repeated two times.

Figure S8

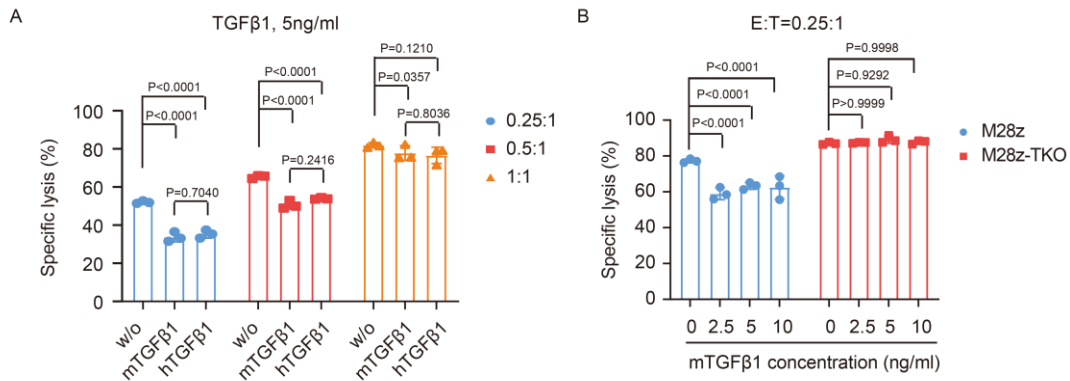

**Figure S8: *TGFBR2* KO could totally rescue the inhibitory effects of mTGFβ1.**

(A) Specific lysis of CRL5826 after co-culture with M28z CAR-T cells at different E:T ratio in the presence of 5ng/ml human (h) or mouse (m) TGFβ1. (B) *TGFBR2* KO completely rescues the negative effects of mTGFβ1 on CAR-T cell-mediated tumor lysis. The statistical analysis represented mean  $\pm$  s.d. of three technical replications per assay in A-B. Two-way ANOVA and Tukey's multiple comparisons test was used in A-B. The assays in A-B were repeated more than three times.

Figure S9

A

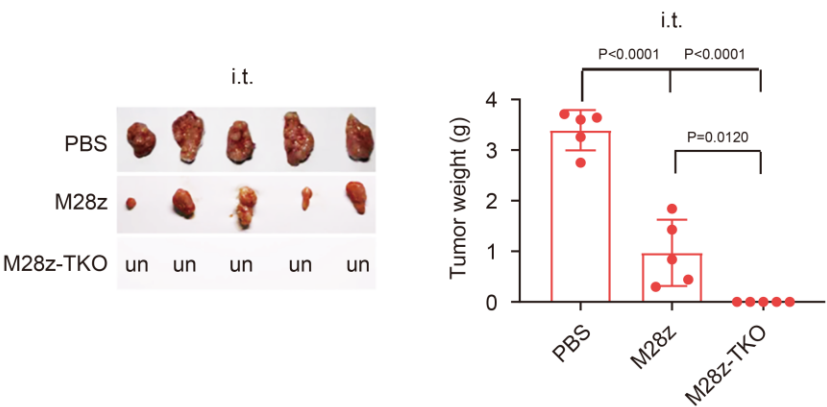

B

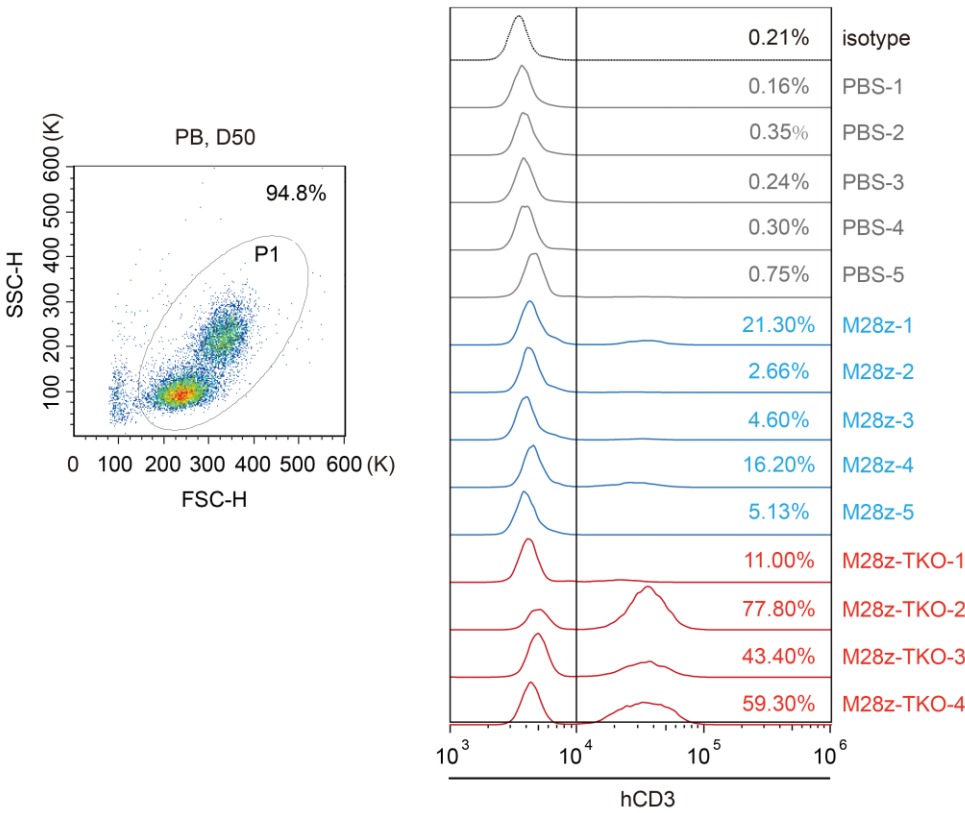

C

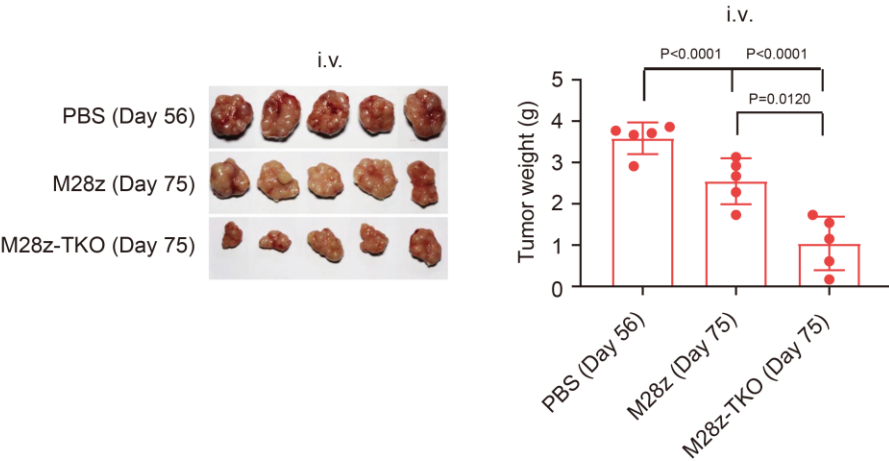

**Figure S9: Detection of in vivo tumor elimination efficacy of *TGFBR2* KO CAR-T cells in CRL5826 CDX model.** Tumor sizes and tumor weights in the end of experiment in CRL5826 CDX model with i.t. (A) and i.v. (C) CAR-T cell injection. (B) The proportion of hCD3 positive cells in mouse peripheral blood 50 days after CAR-T injection. M28z-TKO, *TGFBR2* KO M28z; i.t., intra-tumor; i.v., intravenous; un, undetectable. The statistical analysis represented mean  $\pm$  s.d., n=5. Ordinary one-way ANOVA and Tukey's multiple comparisons test was used.

Figure S10

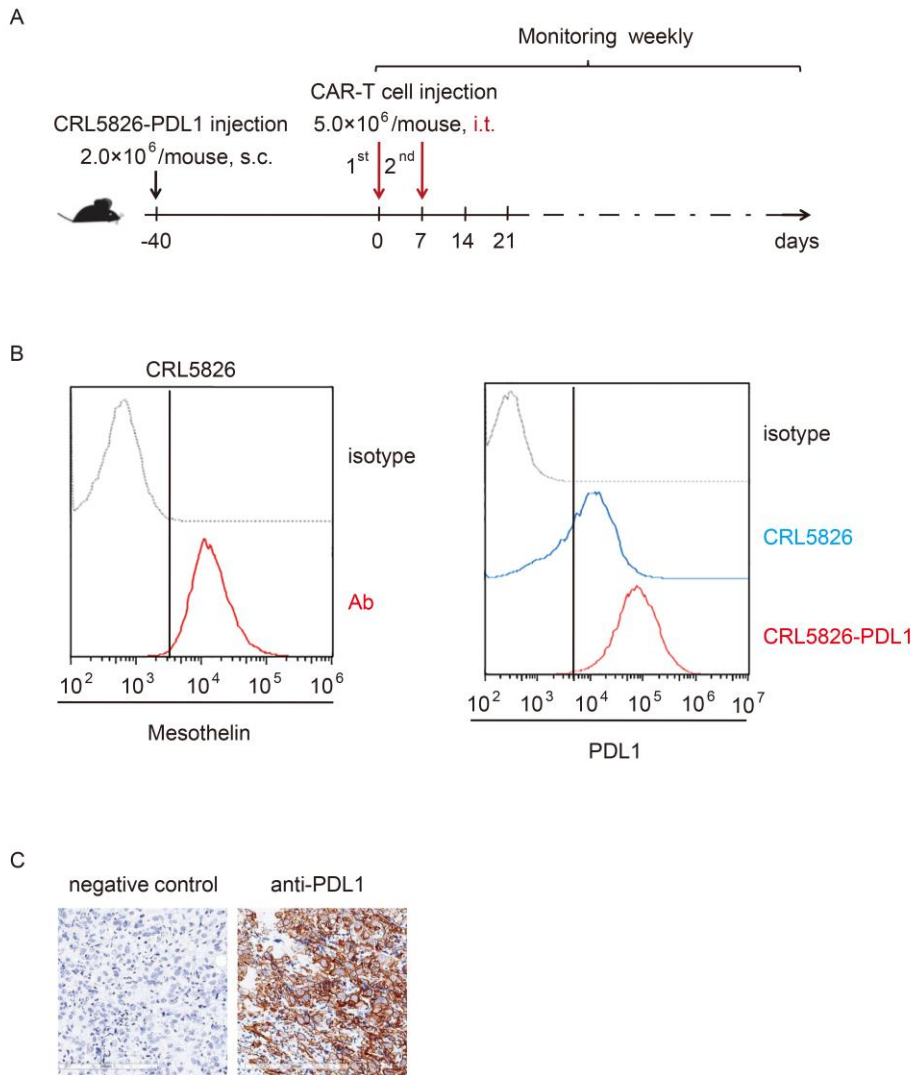

**Figure S10: Detection of *in vivo* tumor elimination efficacy of *TGFBR2* KO CAR-T cells in CRL5826-PDL1 CDX model.** (A) Schematic of the *in vivo* experimental design using CRL5826-PDL1 CDX model. (B) Antigen expression on target tumor cells detected by FACS. (C) PDL1 expression in the CDX model.

Figure S11

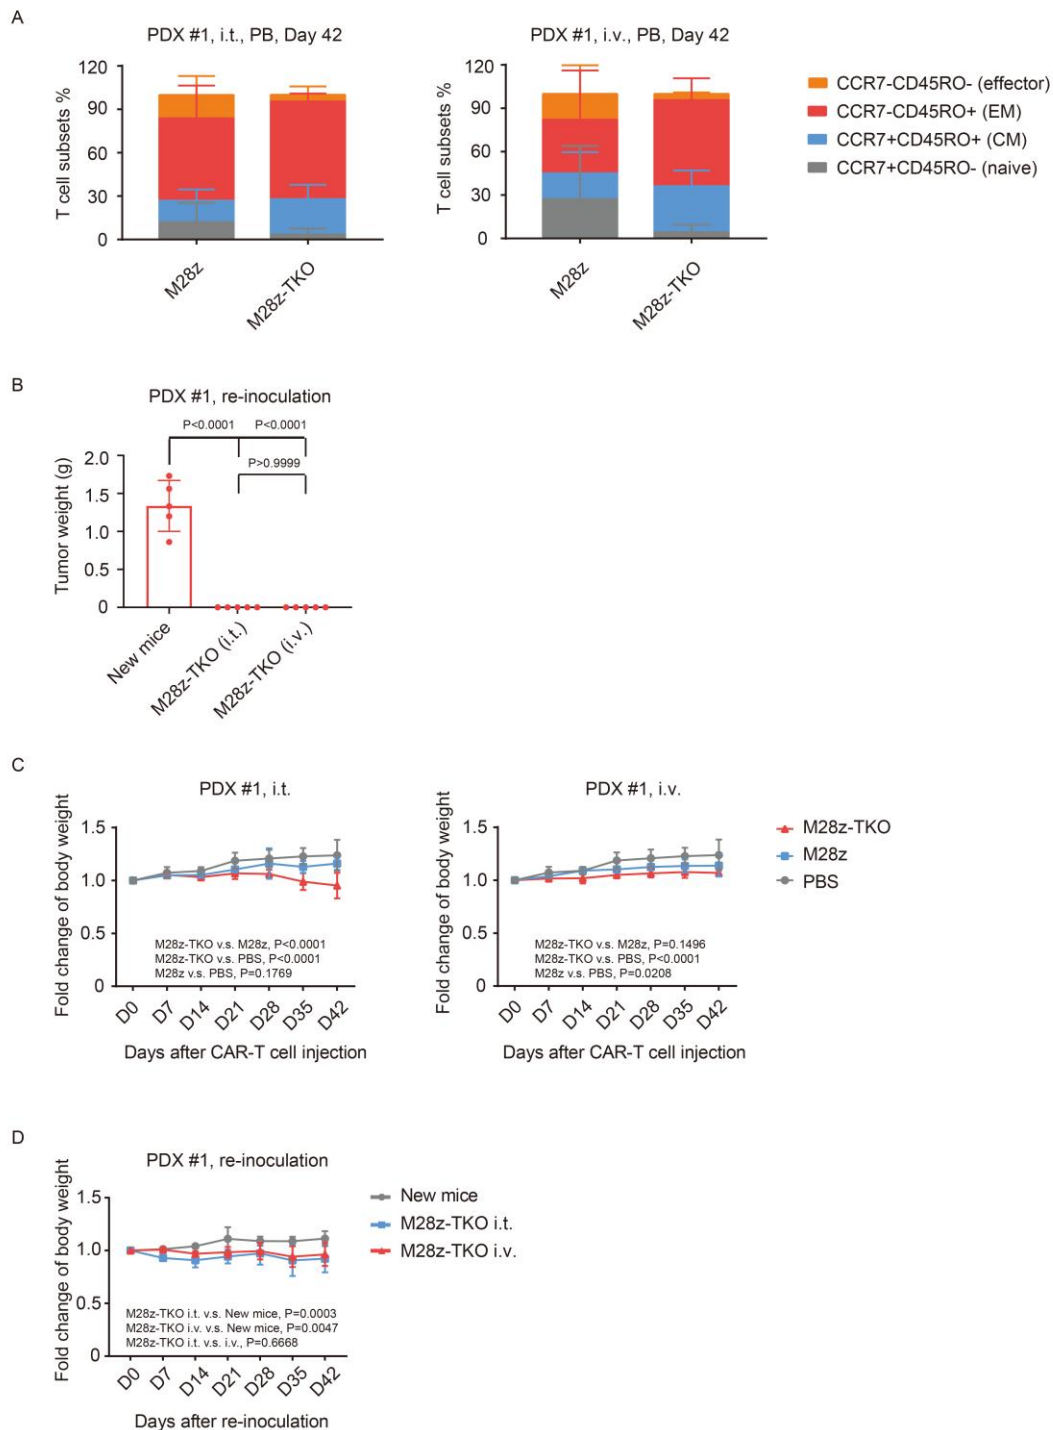

**Figure S11: Detection of in vivo tumor elimination efficacy of *TGFBR2* KO CAR-T cells in PDX tumor 1 model.** (A) T cell subsets analysis in mouse peripheral blood 42 days after CAR-T cell i.t. or i.v. injection. (B) Tumor weight at the end of PDX tumor 1 re-inoculation experiment. (C-D) Fold change of body weight after

PDX tumor 1 primary inoculation (C) and re-inoculation (D). M28z-TKO, *TGFBR2* KO M28z; i.t., intra-tumor; i.v., intravenous; PB, peripheral blood. The statistical analysis represented mean  $\pm$  s.d., n=5. Ordinary one-way ANOVA and Tukey's multiple comparisons test was used in B. Two-way ANOVA and Tukey's multiple comparisons test was used in C-D.

Figure S12

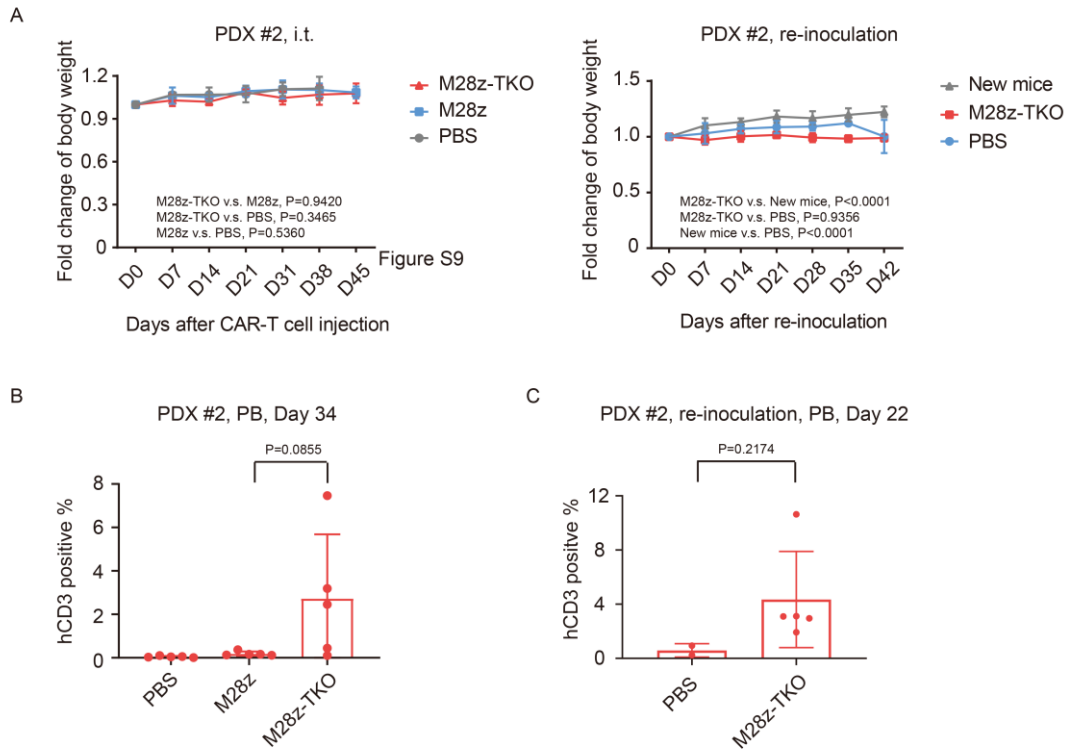

**Figure S12: Detection of in vivo tumor elimination efficacy of *TGFBR2* KO CAR-T cells in PDX tumor 2 model.** (A) Fold change of body weight after PDX tumor 2 primary inoculation and re-inoculation. (B) The proportion of hCD3 positive cells in peripheral blood 34 days after PDX tumor 2 primary inoculation. (C) The proportion of hCD3 positive cells in peripheral blood 22 days after PDX tumor 2 re-inoculation. M28z-TKO, *TGFBR2* KO M28z; i.t., intra-tumor; PB, peripheral blood. The statistical analysis represented mean  $\pm$  s.d.,  $n=5$  except  $n=2$  in PBS group and  $n=4$  in New mice group in PDX #2 re-inoculation experiment. Two-way ANOVA and Tukey's multiple comparisons test was used in A. Ordinary one-way ANOVA and Tukey's multiple comparisons test was used in B. Unpaired t test was used in C.

Figure S13

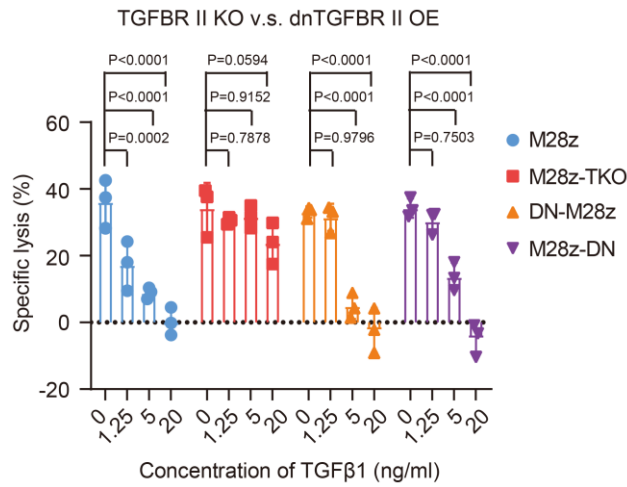

**Figure S13: *TGFBFR2* KO performed better than dn*TGFBFR2* OE in anti-TGFβ 1 negative effect on CAR-T cell specific lysis ability.** The statistical analysis represented mean  $\pm$  s.d. of three technical replications per assay. Two-way ANOVA and Tukey's multiple comparisons test was used. The assays were repeated more than three times.

**Table S1: Primer sequences used in this study**

|                                              |                                                                          |
|----------------------------------------------|--------------------------------------------------------------------------|
| <b>Guide sgRNA sequence</b>                  |                                                                          |
| <i>FOXP3</i> sgRNA                           | gcagctgcgatggtggcatg                                                     |
| <i>TGFBR2</i> sgRNA                          | cctgagcagcccccaccca                                                      |
| <i>PD1</i> sgRNA                             | cgactggccagggcgctgt                                                      |
| <b><i>In vitro</i> transcription primers</b> |                                                                          |
| Forward                                      | taatacgactcactatagNNNNNNNNNNNNNNNNNNNNNNNNNNNNgtttaagagc<br>tatgctggaaac |
| Reverse                                      | aaaagcaccgactcggtgcc                                                     |
| <b>Genotyping primers for PCR</b>            |                                                                          |
| <i>FOXP3</i> -Forward primer                 | gtgggtatgtacatgtacctgt                                                   |
| <i>FOXP3</i> -Reverse primers                | ctaataagttgcagagctggcc                                                   |
| <i>TGFBR2</i> -Forward primer                | cacatctggcccgacatct                                                      |
| <i>TGFBR2</i> -Reverse primer                | gggtggctcagaaagagctg                                                     |
| <i>PD1</i> -Forward primer                   | catctcctctgtctccctgtc                                                    |
| <i>PD1</i> -Reverse primer                   | gccagggactgagagtgaag                                                     |
| <b>Genotyping primers for TIDE sequence</b>  |                                                                          |
| <i>FOXP3</i> -Forward primer                 | ctagagctggggtgcaacta                                                     |
| <i>FOXP3</i> -Reverse primers                | cctcttctctgtcacatgg                                                      |
| <i>TGFBR2</i> -Forward primer                | cacatctggcccgacatct                                                      |
| <i>TGFBR2</i> -Reverse primer                | ggaaactttcctcgttccgc                                                     |
| <i>PD1</i> -Forward primer                   | cctgtctctgtctctctcc                                                      |
| <i>PD1</i> -Reverse primer                   | tgagagtgaaggtccctcc                                                      |
| <b>Primers for Q-PCR</b>                     |                                                                          |
| <i>IL2</i> -Forward primer                   | agaactcaaacctctggaggaag                                                  |
| <i>IL2</i> -Reverse primers                  | gctgtctcatcagcatattcacac                                                 |
| <i>IFNG</i> -Forward primer                  | atgtccaacgcaaagcaatac                                                    |

|                                 |                          |
|---------------------------------|--------------------------|
| <i>IFNG</i> -Reverse primer     | acctcgaacagcatctgac      |
| <i>GZMA</i> -Forward primer     | ctcactcaataaccaggaagag   |
| <i>GZMA</i> -Reverse primer     | gctgggtcatagcatggatag    |
| <i>GZMB</i> -Forward primer     | acactcacacactacaagag     |
| <i>GZMB</i> -Reverse primers    | acgcacaactcaatggtact     |
| <i>FOXP3</i> -Forward primer    | aggaaggacagcacccttcg     |
| <i>FOXP3</i> -Reverse primer    | ctggcagtgttgaggaagt      |
| <i>PDCD1</i> -Forward primer    | aaggcgcagatcaaagagagcc   |
| <i>PDCD1</i> -Reverse primer    | caaccaccagggtttggaactg   |
| <i>CTLA4</i> -Forward primer    | acgggactctacatctgcaagg   |
| <i>CTLA4</i> -Reverse primer    | ggaggaagtcagaatctgggca   |
| <i>TIM3</i> -Forward primer     | gactctagcagacagtgggatc   |
| <i>TIM3</i> -Reverse primer     | ggtgtaagcatccttgaaagg    |
| <i>LAG3</i> -Forward primer     | gcagtgtacttcacagagctgtc  |
| <i>LAG3</i> -Reverse primer     | aagccaaaggctccagtcacca   |
| <i>LAYN</i> -Forward primer     | acagcctgccaggaccttatg    |
| <i>LAYN</i> -Reverse primer     | cgatggctgatggtacatgacc   |
| <i>TIGIT</i> -Forward primer    | tggtggcatctgcacagcagt    |
| <i>TIGIT</i> -Reverse primer    | tttctcctgaggtcacctccac   |
| <i>RGS1</i> -Forward primer     | ttgtgcattcagatgctgctaaac |
| <i>RGS1</i> -Reverse primer     | gaggaacctgggataagagtcc   |
| <i>TNFRSF1B</i> -Forward primer | cgttctccaacacgacttcaccc  |
| <i>TNFRSF1B</i> -Reverse primer | acgtgcagactgcatccatgct   |
| <i>TNFRSF9</i> -Forward primer  | tcttctcacgctccgtttctc    |
| <i>TNFRSF9</i> -Reverse primer  | tggaaatcggcagctacagcca   |
| <i>GATA3</i> -Forward primer    | tgcatgactcactggaggac     |
| <i>GATA3</i> -Reverse primer    | tcaggaggacatgtgtctg      |

|                              |                      |
|------------------------------|----------------------|
| <i>GAPDH</i> -Forward primer | atgacatcaagaaggtggtg |
| <i>GAPDH</i> -Reverse primer | cataccaggaaatgagcttg |

---
